# Supplementary material for: Structural basis for capsid recruitment and coat formation during HSV-1 nuclear egress
Source: eLife. 2020 Jun 24;9:e56627. doi: 10.7554/eLife.56627 (PMC7340501; doi:10.7554/eLife.56627)
Supplement: Figure 1—source data 1. — The reported biological replicate average values (%) are the points presented in Figure 1. [file elife-56627-fig1-data1.xlsx]

## Sheet: NEC+ UL25∆44 Q72A
			NEC220			UL25∆44 Q72A (1:1 NEC:UL25)
Biological Replicate	Technical Replicate	Background (BG)	(ILVs/GUVs)	Raw Value (ILV-BG)	Average (AVG)	ILVs/GUVs	Raw Value (ILV-BG)	Average (AVG)	% Normalized Budding (Raw Values/NEC AVG) * 100	Biological Replicate Average (%)
1	1	0.13	0.32	0.19	0.134242	0.3	0.17	0.13739	126.637	102.344
	2	0.18	0.272727	0.0927273		0.306931	0.126931		94.5533
	3	0.18	0.3	0.12		0.295238	0.115238		85.8433
2	1	0.1	0.23	0.13	0.12	0.284211	0.184211	0.114737	153.509	95.614
	2	0.12	0.25	0.13		0.2	0.08		66.6667
	3	0.15	0.25	0.1		0.23	0.08		66.6667
			NEC220			UL25∆44 Q72A (1:6 NEC:UL25)
Biological Replicate	Technical Replicate	Background (BG)	(ILVs/GUVs)	Raw Value (ILV-BG)	Average (AVG)	ILVs/GUVs	Raw Value (ILV-BG)	Average (AVG)	% Normalized Budding (Raw Values/NEC AVG) * 100	Biological Replicate Average (%)
1	1	0.13	0.32	0.19	0.134242	0.23	0.1	0.0966667	74.4921	72.009
	2	0.18	0.272727	0.0927273		0.29	0.11		81.9413
	3	0.18	0.3	0.12		0.26	0.08		59.5937
2	1	0.1	0.23	0.13	0.12	0.216495	0.116495	0.102165	97.079	85.1375
	2	0.12	0.25	0.13		0.26	0.14		116.667
	3	0.15	0.25	0.1		0.2	0.05		41.6667
			NEC220			UL25∆44 Q72A (1:8 NEC:UL25)
Biological Replicate	Technical Replicate	Background (BG)	(ILVs/GUVs)	Raw Value (ILV-BG)	Average (AVG)	ILVs/GUVs	Raw Value (ILV-BG)	Average (AVG)	% Normalized Budding (Raw Values/NEC AVG) * 100	Biological Replicate Average (%)
1	1	0.17	0.333333	0.163333	0.166349	0.232323	0.0623232	0.0790737	37.4653	47.5348
	2	0.17	0.285714	0.115714		0.244898	0.074898		45.0245
	3	0.11	0.33	0.22		0.21	0.1		60.1145
2	1	0.13	0.37	0.24	0.202465	0.263158	0.133158	0.0910526	65.7685	44.9721
	2	0.17	0.3125	0.1425		0.29	0.12		59.2696
	3	0.19	0.414894	0.224894		0.21	0.02		9.87827
			NEC220			UL25∆44 Q72A (1:10 NEC:UL25)
Biological Replicate	Technical Replicate	Background (BG)	(ILVs/GUVs)	Raw Value (ILV-BG)	Average (AVG)	ILVs/GUVs	Raw Value (ILV-BG)	Average (AVG)	% Normalized Budding (Raw Values/NEC AVG) * 100	Biological Replicate Average (%)
1	1	0.13	0.32	0.19	0.134242	0.19	0.06	0.0300595	44.6953	22.392
	2	0.18	0.272727	0.0927273		0.21875	0.03875		28.8657
	3	0.18	0.3	0.12		0.171429	-0.00857143		-6.38504
2	1	0.1	0.23	0.13	0.12	0.13	0.03	0.0366667	25	30.5556
	2	0.12	0.25	0.13		0.2	0.08		66.6667
	3	0.15	0.25	0.1		0.15	0		0
			NEC220			UL25∆44 Q72A (1:20 NEC:UL25)
Biological Replicate	Technical Replicate	Background (BG)	(ILVs/GUVs)	Raw Value (ILV-BG)	Average (AVG)	ILVs/GUVs	Raw Value (ILV-BG)	Average (AVG)	% Normalized Budding (Raw Values/NEC AVG) * 100	Biological Replicate Average (%)
1	1	0.17	0.333333	0.163333	0.166349	0.232323	0.0623232	0.0474411	37.4653	28.519
	2	0.17	0.285714	0.115714		0.19	0.02		12.0229
	3	0.11	0.33	0.22		0.17	0.06		36.0687
2	1	0.13	0.37	0.24	0.202465	0.23	0.1	0.0366667	49.3914	18.1102
	2	0.17	0.3125	0.1425		0.17	0		0
	3	0.19	0.414894	0.224894		0.2	0.01		4.93914

## Sheet: NEC + UL25∆58 Q72A
			NEC220			UL25∆58 Q72A (1:1 NEC:UL25)
Biological Replicate	Technical Replicate	Background (BG)	(ILVs/GUVs)	Raw Value (ILV-BG)	Average (AVG)	ILVs/GUVs	Raw Value (ILV-BG)	Average (AVG)	% Normalized Budding (Raw Values/NEC AVG) * 100	Biological Replicate Average (%)
1	1	0.1	0.23	0.13	0.12	0.2	0.1	0.108316	83.3333	90.2637
	2	0.12	0.25	0.13		0.262626	0.142626		118.855
	3	0.15	0.25	0.1		0.232323	0.0823232		68.6027
2	1	0.12	0.28	0.16	0.133333	0.26	0.14	0.107542	105	80.6566
	2	0.15	0.28	0.13		0.262626	0.112626		84.4697
	3	0.17	0.28	0.11		0.24	0.07		52.5
			NEC220			UL25∆58 Q72A (1:6 NEC:UL25)
Biological Replicate	Technical Replicate	Background (BG)	(ILVs/GUVs)	Raw Value (ILV-BG)	Average (AVG)	ILVs/GUVs	Raw Value (ILV-BG)	Average (AVG)	% Normalized Budding (Raw Values/NEC AVG) * 100	Biological Replicate Average (%)
1	1	0.1	0.23	0.13	0.12	0.19	0.09	0.115556	75	96.2963
	2	0.12	0.25	0.13		0.266667	0.146667		122.222
	3	0.15	0.25	0.1		0.26	0.11		91.6667
2	1	0.12	0.28	0.16	0.133333	0.291667	0.171667	0.102671	128.75	77.0034
	2	0.15	0.28	0.13		0.221053	0.0710526		53.2895
	3	0.17	0.28	0.11		0.235294	0.0652941		48.9706
			NEC220			UL25∆58 Q72A (1:8 NEC:UL25)
Biological Replicate	Technical Replicate	Background (BG)	(ILVs/GUVs)	Raw Value (ILV-BG)	Average (AVG)	ILVs/GUVs	Raw Value (ILV-BG)	Average (AVG)	% Normalized Budding (Raw Values/NEC AVG) * 100	Biological Replicate Average (%)
1	1	0.17	0.333333	0.163333	0.166349	0.442105	0.272105	0.217643	163.575	130.835
	2	0.17	0.285714	0.115714		0.360825	0.190825		114.713
	3	0.11	0.33	0.22		0.3	0.19		114.218
2	1	0.13	0.37	0.24	0.202465	0.35	0.22	0.209541	108.661	103.495
	2	0.17	0.3125	0.1425		0.40404	0.23404		115.596
	3	0.19	0.414894	0.224894		0.364583	0.174583		86.2291
			NEC220			UL25∆58 Q72A (1:10 NEC:UL25)
Biological Replicate	Technical Replicate	Background (BG)	(ILVs/GUVs)	Raw Value (ILV-BG)	Average (AVG)	ILVs/GUVs	Raw Value (ILV-BG)	Average (AVG)	% Normalized Budding (Raw Values/NEC AVG) * 100	Biological Replicate Average (%)
1	1	0.1	0.23	0.13	0.12	0.171717	0.0717172	0.0849584	59.7643	70.7986
	2	0.12	0.25	0.13		0.19	0.07		58.3333
	3	0.15	0.25	0.1		0.263158	0.113158		94.2982
2	1	0.12	0.28	0.16	0.133333	0.28	0.16	0.0933333	120	70
	2	0.15	0.28	0.13		0.22	0.07		52.5
	3	0.17	0.28	0.11		0.22	0.05		37.5
			NEC220			UL25∆58 Q72A (1:20 NEC:UL25)
Biological Replicate	Technical Replicate	Background (BG)	(ILVs/GUVs)	Raw Value (ILV-BG)	Average (AVG)	ILVs/GUVs	Raw Value (ILV-BG)	Average (AVG)	% Normalized Budding (Raw Values/NEC AVG) * 100	Biological Replicate Average (%)
1	1	0.17	0.333333	0.163333	0.166349	0.357895	0.187895	0.174386	112.952	104.831
	2	0.17	0.285714	0.115714		0.305263	0.135263		81.3128
	3	0.11	0.33	0.22		0.31	0.2		120.229
2	1	0.13	0.37	0.24	0.202465	0.4	0.27	0.203808	133.357	100.664
	2	0.17	0.3125	0.1425		0.336842	0.166842		82.4056
	3	0.19	0.414894	0.224894		0.364583	0.174583		86.2291

## Sheet: NEC + UL25∆73
			NEC220			UL25∆73 (1:1 NEC:UL25)
Biological Replicate	Technical Replicate	Background (BG)	(ILVs/GUVs)	Raw Value (ILV-BG)	Average (AVG)	ILVs/GUVs	Raw Value (ILV-BG)	Average (AVG)	% Normalized Budding (Raw Values/NEC AVG) * 100	Biological Replicate Average (%)
1	1	0.13	0.32	0.19	0.134242	0.382979	0.252979	0.148535	188.449	110.647
	2	0.18	0.272727	0.0927273		0.29	0.11		81.9413
	3	0.18	0.3	0.12		0.262626	0.0826263		61.55
2	1	0.03	0.115789	0.0857895	0.0777188	0.105263	0.0752632	0.0631914	96.8404	81.3077
	2	0.04	0.0927835	0.0527835		0.0824742	0.0424742		54.6512
	3	0.02	0.114583	0.0945833		0.0918367	0.0718367		92.4316
3	1	0.01	0.0594059	0.0494059	0.0500616	0.0707071	0.0607071	0.0473105	121.265	94.5046
	2	0.01	0.0666667	0.0566667		0.07	0.06		119.852
	3	0.04	0.0841121	0.0441121		0.0612245	0.0212245		42.3968
			NEC220			UL25∆73 (1:6 NEC:UL25)
Biological Replicate	Technical Replicate	Background (BG)	(ILVs/GUVs)	Raw Value (ILV-BG)	Average (AVG)	ILVs/GUVs	Raw Value (ILV-BG)	Average (AVG)	% Normalized Budding (Raw Values/NEC AVG) * 100	Biological Replicate Average (%)
1	1	0.13	0.32	0.19	0.134242	0.27	0.14	0.0979012	104.289	72.9287
	2	0.18	0.272727	0.0927273		0.31	0.13		96.8397
	3	0.18	0.3	0.12		0.203704	0.0237037		17.6574
2	1	0.03	0.115789	0.0857895	0.0777188	0.12	0.09	0.0739456	115.802	95.1451
	2	0.04	0.0927835	0.0527835		0.1	0.06		77.2014
	3	0.02	0.114583	0.0945833		0.0918367	0.0718367		92.4316
3	1	0.01	0.0594059	0.0494059	0.0500616	0.07	0.06	0.0509131	119.852	101.701
	2	0.01	0.0666667	0.0566667		0.0594059	0.0494059		98.6903
	3	0.04	0.0841121	0.0441121		0.0833333	0.0433333		86.56
			NEC220			UL25∆73 (1:8 NEC:UL25)
Biological Replicate	Technical Replicate	Background (BG)	(ILVs/GUVs)	Raw Value (ILV-BG)	Average (AVG)	ILVs/GUVs	Raw Value (ILV-BG)	Average (AVG)	% Normalized Budding (Raw Values/NEC AVG) * 100	Biological Replicate Average (%)
1	1	0.17	0.333333	0.163333	0.166349	0.357895	0.187895	0.202632	112.952	121.811
	2	0.17	0.285714	0.115714		0.33	0.16		96.1832
	3	0.11	0.33	0.22		0.37	0.26		156.298
2	1	0.13	0.37	0.24	0.202465	0.397959	0.267959	0.202093	132.349	99.8166
	2	0.17	0.3125	0.1425		0.340426	0.170426		84.1755
	3	0.19	0.414894	0.224894		0.357895	0.167895		82.9255
			NEC220			UL25∆73 (1:10 NEC:UL25)
Biological Replicate	Technical Replicate	Background (BG)	(ILVs/GUVs)	Raw Value (ILV-BG)	Average (AVG)	ILVs/GUVs	Raw Value (ILV-BG)	Average (AVG)	% Normalized Budding (Raw Values/NEC AVG) * 100	Biological Replicate Average (%)
1	1	0.13	0.32	0.19	0.134242	0.353535	0.223535	0.140978	166.516	105.017
	2	0.18	0.272727	0.0927273		0.273684	0.0936842		69.7873
	3	0.18	0.3	0.12		0.285714	0.105714		78.7488
2	1	0.03	0.115789	0.0857895	0.0777188	0.11828	0.0882796	0.067021	113.588	86.2353
	2	0.04	0.0927835	0.0527835		0.08	0.04		51.4676
	3	0.02	0.114583	0.0945833		0.0927835	0.0727835		93.6498
3	1	0.01	0.0594059	0.0494059	0.0500616	0.0442478	0.0342478	0.046508	68.4113	92.9016
	2	0.01	0.0666667	0.0566667		0.0756303	0.0656303		131.099
	3	0.04	0.0841121	0.0441121		0.079646	0.039646		79.1945
			NEC220			UL25∆73 (1:20 NEC:UL25)
Biological Replicate	Technical Replicate	Background (BG)	(ILVs/GUVs)	Raw Value (ILV-BG)	Average (AVG)	ILVs/GUVs	Raw Value (ILV-BG)	Average (AVG)	% Normalized Budding (Raw Values/NEC AVG) * 100	Biological Replicate Average (%)
1	1	0.17	0.333333	0.163333	0.166349	0.359551	0.189551	0.188798	113.947	113.495
	2	0.17	0.285714	0.115714		0.336842	0.166842		100.296
	3	0.11	0.33	0.22		0.32	0.21		126.24
2	1	0.13	0.37	0.24	0.202465	0.34	0.21	0.143093	103.722	70.6755
	2	0.17	0.3125	0.1425		0.309278	0.139278		68.7915
	3	0.19	0.414894	0.224894		0.27	0.08		39.5131
