# Supplementary material for: Structural basis for capsid recruitment and coat formation during HSV-1 nuclear egress
Source: eLife. 2020 Jun 24;9:e56627. doi: 10.7554/eLife.56627 (PMC7340501; doi:10.7554/eLife.56627)
Supplement: Figure 2—source data 1. — The reported biological replicate average values (%) are the points presented in Figure 2. [file elife-56627-fig2-data1.xlsx]

## Sheet: NEC + UL25∆50 Q72A
			NEC220			UL25∆50 Q72A (1:10 NEC:UL25)
Biological Replicate	Technical Replicate	Background (BG)	(ILVs/GUVs)	Raw Value (ILV-BG)	Average (AVG)	ILVs/GUVs	Raw Value (ILV-BG)	Average (AVG)	% Normalized Budding (Raw Values/NEC AVG) * 100	Biological Replicate Average (%)
1	1	0.15	0.346939	0.196939	0.216825	0.172414	0.0224138	0.0307179	10.3373	14.1672
	2	0.16	0.4	0.24		0.180851	0.0208511		9.61655
	3	0.14	0.353535	0.213535		0.188889	0.0488889		22.5477
2	1	0.05	0.19	0.14	0.16	0.12	0.07	0.0433333	43.75	27.0833
	2	0.09	0.23	0.14		0.1	0.01		6.25
	3	0.06	0.26	0.2		0.11	0.05		31.25

## Sheet: NEC + eGFP-UL25∆50 Q72A
			NEC220			eGFP-UL25∆50 Q72A (1:10 NEC:UL25)
Biological Replicate	Technical Replicate	Background (BG)	(ILVs/GUVs)	Raw Value (ILV-BG)	Average (AVG)	ILVs/GUVs	Raw Value (ILV-BG)	Average (AVG)	% Normalized Budding (Raw Values/NEC AVG) * 100	Biological Replicate Average (%)
1	1	0.02	0.08	0.06	0.08	0.04	0.02	0.01	25	12.5
	2	0.03	0.15	0.12		0.04	0.01		12.5
	3	0.03	0.09	0.06		0.03	0		0
2	1	0.02	0.08	0.06	0.0666667	0.03	0.01	0.01	15	15
	2	0.03	0.09	0.06		0.03	0		0
	3	0.02	0.1	0.08		0.04	0.02		30

## Sheet: NEC + eGFP-UL25∆73
			NEC220			eGFP-UL25∆73 (1:10 NEC:UL25)
Biological Replicate	Technical Replicate	Background (BG)	(ILVs/GUVs)	Raw Value (ILV-BG)	Average (AVG)	ILVs/GUVs	Raw Value (ILV-BG)	Average (AVG)	% Normalized Budding (Raw Values/NEC AVG) * 100	Biological Replicate Average (%)
1	1	0.02	0.08	0.06	0.08	0.122449	0.102449	0.0908163	128.061	113.52
	2	0.03	0.15	0.12		0.12	0.09		112.5
	3	0.03	0.09	0.06		0.11	0.08		100
2	1	0.02	0.08	0.06	0.0666667	0.0957447	0.0757447	0.0559699	113.617	83.9548
	2	0.03	0.09	0.06		0.07	0.04		60
	3	0.02	0.1	0.08		0.0721649	0.0521649		78.2474
