# Supplementary material for: Structural basis for capsid recruitment and coat formation during HSV-1 nuclear egress
Source: eLife. 2020 Jun 24;9:e56627. doi: 10.7554/eLife.56627 (PMC7340501; doi:10.7554/eLife.56627)
Supplement: Figure 3—source data 1. — The reported biological replicate average values (%) are the points presented in Figure 3. [file elife-56627-fig3-data1.xlsx]

## Sheet: CBM + UL25∆44 Q72A
			NEC220			CBM alone
Biological Replicate	Technical Replicate	Background (BG)	(ILVs/GUVs)	Raw Value (ILV-BG)	Average (AVG)	ILVs/GUVs	Raw Value (ILV-BG)	Average (AVG)	% Normalized Budding (Raw Values/NEC AVG) * 100	Biological Replicate Average (%)
1	1	0.02	0.11	0.09	0.0804762	0.09	0.07	0.0833333	86.9822	103.55
	2	0.01	0.0714286	0.0614286		0.1	0.09		111.834
	3	0.01	0.1	0.09		0.1	0.09		111.834
2	1	0.06	0.184466	0.124466	0.116783	0.16	0.1	0.123333	85.6291	105.609
	2	0.11	0.205882	0.0958824		0.24	0.13		111.318
	3	0.1	0.23	0.13		0.24	0.14		119.881
			NEC220			UL25∆44 Q72A (1:1 CBM:UL25)
Biological Replicate	Technical Replicate	Background (BG)	(ILVs/GUVs)	Raw Value (ILV-BG)	Average (AVG)	ILVs/GUVs	Raw Value (ILV-BG)	Average (AVG)	% Normalized Budding (Raw Values/NEC AVG) * 100	Biological Replicate Average (%)
1	1	0.02	0.11	0.09	0.0804762	0.09	0.07	0.0566667	86.9822	70.4142
	2	0.01	0.0714286	0.0614286		0.07	0.06		74.5562
	3	0.01	0.1	0.09		0.05	0.04		49.7041
2	1	0.06	0.184466	0.124466	0.116783	0.25	0.19	0.126667	162.695	108.463
	2	0.11	0.205882	0.0958824		0.21	0.1		85.6291
	3	0.1	0.23	0.13		0.19	0.09		77.0661
			NEC220			UL25∆44 Q72A (1:6 CBM:UL25)
Biological Replicate	Technical Replicate	Background (BG)	(ILVs/GUVs)	Raw Value (ILV-BG)	Average (AVG)	ILVs/GUVs	Raw Value (ILV-BG)	Average (AVG)	% Normalized Budding (Raw Values/NEC AVG) * 100	Biological Replicate Average (%)
1	1	0.02	0.11	0.09	0.0804762	0.11	0.09	0.0749817	111.834	93.1725
	2	0.01	0.0714286	0.0614286		0.1	0.09		111.834
	3	0.01	0.1	0.09		0.0549451	0.0449451		55.8489
2	1	0.06	0.184466	0.124466	0.116783	0.17	0.11	0.103333	94.192	88.4834
	2	0.11	0.205882	0.0958824		0.21	0.1		85.6291
	3	0.1	0.23	0.13		0.2	0.1		85.6291
			NEC220			UL25∆44 Q72A (1:10 CBM:UL25)
Biological Replicate	Technical Replicate	Background (BG)	(ILVs/GUVs)	Raw Value (ILV-BG)	Average (AVG)	ILVs/GUVs	Raw Value (ILV-BG)	Average (AVG)	% Normalized Budding (Raw Values/NEC AVG) * 100	Biological Replicate Average (%)
1	1	0.02	0.11	0.09	0.0804762	0.05	0.03	0.06	37.2781	74.5562
	2	0.01	0.0714286	0.0614286		0.09	0.08		99.4083
	3	0.01	0.1	0.09		0.08	0.07		86.9822
2	1	0.06	0.184466	0.124466	0.116783	0.163265	0.103265	0.0991837	88.4251	84.93
	2	0.11	0.205882	0.0958824		0.214286	0.104286		89.2989
	3	0.1	0.23	0.13		0.19	0.09		77.0661

## Sheet: CBM + eGFP-UL25∆50 Q72A
			NEC220			eGFP-UL25∆50 Q72A (1:10 CBM:UL25)
Biological Replicate	Technical Replicate	Background (BG)	(ILVs/GUVs)	Raw Value (ILV-BG)	Average (AVG)	ILVs/GUVs	Raw Value (ILV-BG)	Average (AVG)	% Normalized Budding (Raw Values/NEC AVG) * 100	Biological Replicate Average (%)
1	1	0.05	0.17	0.12	0.156667	0.21	0.16	0.17	102.128	108.511
	2	0.04	0.21	0.17		0.19	0.15		95.7447
	3	0.02	0.2	0.18		0.22	0.2		127.66
2	1	0.05	0.19	0.14	0.16	0.21	0.16	0.184074	100	115.046
	2	0.09	0.23	0.14		0.22	0.13		81.25
	3	0.06	0.26	0.2		0.322222	0.262222		163.889
