# Supplementary material for: Structural basis for capsid recruitment and coat formation during HSV-1 nuclear egress
Source: eLife. 2020 Jun 24;9:e56627. doi: 10.7554/eLife.56627 (PMC7340501; doi:10.7554/eLife.56627)
Supplement: Supplementary file 1. — UL25∆44 Q72A/NEC particles used for cryoET averaging. List of primers used for cloning procedures described in Materials and methods. [file elife-56627-supp1.docx]

**Supplementary File 1**

**Structural basis for capsid recruitment and coat formation during HSV-1 nuclear egress**

Elizabeth B. Draganova1, Jiayan Zhang2,3,4, Z. Hong Zhou2,3,4, and Ekaterina E. Heldwein1,#

1Department of Molecular Biology and Microbiology, Tufts University School of Medicine, Boston, MA 02111, USA

2Department of Microbiology, Immunology & Molecular Genetics, University of California, Los Angeles (UCLA), Los Angeles, California, 90095, USA

3Molecular Biology Institute, UCLA, Los Angeles, California, 90095, USA

4California NanoSystems Institute, UCLA, Los Angeles, California, 90095, USA

Supplementary File 1 contains Supplementary Tables 1 and 2

| **Vesicle** | **Vesicle Radius (nm)** | **Vesicle Area*a* (nm2)** | **Particles forming**  **5-pointed stars*b,c*** | **Particles forming**  **5-pointed stars (picked for analysis)** | **Area of particles forming 5-pointed stars*d*(nm2)** | **Ratio of particles forming 5-pointed stars/vesicle (%)** |
| --- | --- | --- | --- | --- | --- | --- |
| 1 | 105 | 34,521 | 233 | 155 | 7,626 | 22 |
| 2 | 263 | 217,317 | 479 | 319 | 15,695 | 7 |
| 3 | 227 | 161,838 | 458 | 305 | 15,006 | 9 |
| 4 | 317 | 315,940 | 450 | 300 | 14,760 | 5 |
| 5 | 318 | 317,977 | 450 | 300 | 14,760 | 5 |
| 6 | 202 | 128,650 | 462 | 308 | 15,154 | 12 |
| 7 | 399 | 500,418 | 459 | 306 | 15,055 | 3 |
| 8 | 187 | 109,794 | 195 | 130 | 6,396 | 6 |
| 9 | 249 | 195,456 | 453 | 302 | 14,858 | 8 |
| 10 | 267 | 223,775 | 453 | 302 | 14,858 | 7 |
| **Average** | **253** | **220,569** | **409** | **273** | **13,417** | **8** |

**Supplementary Table 1. UL25∆44 Q72A/NEC particles used for cryoET averaging.** The estimated vesicle surface coverage (%) by particles picked for cryoET data processing was calculated using certain assumptions, as indicated within the table.

*a* We assume all vesicles are spherical; Area = π * r * r; r = radius

*b*90% of particles picked from tomograms are forming 5-pointed star shaped density (based on the cross-correlation coefficient (CCC) value)

*c* 60% of particles forming 5-pointed star shaped density were picked from tomograms

*d* We assume the area of each 5-pointed star = (side of UL25 pentagon = 9.8 nm; see Figure 5)

**Supplementary Table 2.** **List of primers used for cloning procedures described in Materials and Methods.** All primers are listed in the 5’-3’ direction. Restriction sites are underlined and mutations are bolded.

| **Primer Name** | **Primer Sequence (5’-3’)** | **Restriction Site** |
| --- | --- | --- |
| UL25Δ44 fwd (JB133) | aaaaaaggatcccgtgaaaccgcagcagaacagg | BamHI |
| UL25Δ50 fwd (ED034A) | aaaaaaggatcccaggttgttgttctgcaggcacagcgt | BamHI |
| UL25Δ73 fwd (JB238) | aaaaaaggatccgccgaactgccggttgatattg | BamHI |
| UL25 rev (JB134) | aaaaaactcgagttattacactgcgctcagatactgagg | XhoI |
| UL25Δ44 Q72A (ED006) | aatgcagcaatg**gcg**gcagcc | Site-directed |
| UL25Δ44 Q72A (ED007) | ggctgc**cgc**cattgctgcatt | Site-directed |
| eGFP fwd (ED010) | aaaaaaggatccgtgagcaagggcgaggagctg | BamHI |
| eGFP rev (ED049) | aaaaaaggatcccttgtacagctcgtccatgccgagagtg | BamHI |
| UL31 CBM fwd (JB208) | ccgtgtcggccgca**gcc**atttat**gctgca**atgagg**gcc**atcagcttcgacggg | SOE |
| UL31 CBM rev (JB209) | cccgtcgaagctgat**ggc**cctcat**tgcagc**ataaat**ggc**tgcggccgacacgg | SOE |
